# Supplementary material for: Comparison of Radiomic Features in a Diverse Cohort of Patients With Pancreatic Ductal Adenocarcinomas
Source: Front Oncol. 2021 Jul 22;11:712950. doi: 10.3389/fonc.2021.712950 (PMC8339963; doi:10.3389/fonc.2021.712950)
Supplement: Supplementary file 2 [file Table_2.xlsx]

## Sheet: radi_cox_interact_median_cut_si
Supplementary Table 2. Associations between radiomic features and overall survival in a racially/ethnically diverse pancreatic cancer cohort.
Radiomic feature	term	Hazard ratio	Lower confidence limit	Upper confidence	p value	interaction
volumetric_mean_of_ct_number_hu	volumetric_mean_of_ct_number_huLow	1.06261	0.531789	2.12329	0.86348	No
volumetric_mean_of_ct_number_hu	race_ethnicity_AA	1.36313	0.616412	3.01441	0.44424	No
volumetric_mean_of_ct_number_hu	volumetric_mean_of_ct_number_huLow:race_ethnicity_AA	3.90216	1.19179	12.7764	0.0244547	Yes
glcm_avg_column_mean	glcm_avg_column_meanLow	0.881456	0.443755	1.75089	0.718585	No
glcm_avg_column_mean	race_ethnicity_AA	1.22648	0.56152	2.67891	0.60854	No
glcm_avg_column_mean	glcm_avg_column_meanLow:race_ethnicity_AA	4.70544	1.44035	15.3721	0.0103453	Yes
glcm_avg_row_mean	glcm_avg_row_meanLow	1.06261	0.531789	2.12329	0.86348	No
glcm_avg_row_mean	race_ethnicity_AA	1.36313	0.616412	3.01441	0.44424	No
glcm_avg_row_mean	glcm_avg_row_meanLow:race_ethnicity_AA	3.90216	1.19179	12.7764	0.0244547	Yes
glcm_cluster_tendency_for_grey_leveled_image_from_ibsi_by_slice_with_merging	glcm_cluster_tendency_for_grey_leveled_image_from_ibsi_by_slice_with_mergingLow	1.13297	0.570473	2.25009	0.721381	No
glcm_cluster_tendency_for_grey_leveled_image_from_ibsi_by_slice_with_merging	race_ethnicity_AA	4.09238	1.79048	9.35368	0.000834694	No
glcm_cluster_tendency_for_grey_leveled_image_from_ibsi_by_slice_with_merging	glcm_cluster_tendency_for_grey_leveled_image_from_ibsi_by_slice_with_mergingLow:race_ethnicity_AA	0.297662	0.0935923	0.94669	0.0400952	Yes
